1 Spontaneous restoration of functional  $\beta$ -cell mass in obese SM/J mice

2  
3

4 Mario A Miranda<sup>1</sup>, Caryn Carson<sup>1</sup>, Celine L St Pierre<sup>1</sup>, Juan F Macias-Velasco<sup>1</sup>, Jing W Hughes<sup>2</sup>, Marcus  
5 Kunzmann<sup>1</sup>, Heather Schmidt<sup>1</sup>, Jessica P Wayhart<sup>1</sup>, Heather A Lawson<sup>1#</sup>.

6  
7  
8  
9

10 <sup>1</sup>Department of Genetics, Washington University School of Medicine, 660 South Euclid Ave, Saint Louis, MO,  
11 USA

12 <sup>2</sup> Department of Medicine, Washington University School of Medicine, 660 South Euclid Ave, Saint Louis, MO,  
13 USA

14  
15  
16  
17  
18  
19  
20

21 #Corresponding author

22 660 South Euclid Ave

23 Campus Box 8232

24 Saint Louis, MO, 63110

25 ph: 314-362-7269, fax: 314-362-7855

26  
27  
28  
29  
30  
31  
32  
33  
34

35 Keywords: hyperglycemia, insulin,  $\beta$ -cell mass, diabetes, obesity, mouse model

36  
37  
38  
39  
40  
41  
42  
43  
44  
45  
46  
47

48 **Abstract**

49 Maintenance of functional  $\beta$ -cell mass is critical to preventing diabetes, but the physiological mechanisms that cause  
50  $\beta$ -cell populations to thrive or fail in the context of obesity are unknown. High fat-fed SM/J mice spontaneously  
51 transition from hyperglycemic-obese to normoglycemic-obese with age, providing a unique opportunity to study  $\beta$ -  
52 cell adaptation. Here, we characterize insulin homeostasis, islet morphology, and  $\beta$ -cell function during SM/J's  
53 diabetic remission. As they resolve hyperglycemia, obese SM/J mice dramatically increase circulating and  
54 pancreatic insulin levels while improving insulin sensitivity. Immunostaining of pancreatic sections reveals that  
55 obese SM/J mice selectively increase  $\beta$ -cell mass but not  $\alpha$ -cell mass. Obese SM/J mice do not show elevated  $\beta$ -  
56 cell mitotic index, but rather elevated  $\alpha$ -cell mitotic index. Functional assessment of isolated islets reveals that obese  
57 SM/J mice increase glucose stimulated insulin secretion, decrease basal insulin secretion, and increase islet insulin  
58 content. These results establish that  $\beta$ -cell mass expansion and improved  $\beta$ -cell function underlie the resolution of  
59 hyperglycemia, indicating that obese SM/J mice are a valuable tool for exploring how functional  $\beta$ -cell mass can  
60 be recovered in the context of obesity.

61

62

63

64

65

66

67

68

69

70

71

72

## 73 Introduction

74 Obesity and diabetes are a deadly combination, compounding risk for cardiovascular disease, cancer, and  
75 stroke(30, 65, 95). Obesity raises the risk of developing type 2 diabetes 27-76 fold, while approximately 60% of  
76 individuals with diabetes are obese(1, 12, 15, 19). Chronic obesity exerts glycemic stress on pancreatic  $\beta$ -cells,  
77 causing dysregulation and dysfunction, ultimately resulting in hyperglycemia(49, 67, 77, 86). Despite the stress  
78 obesity places on  $\beta$ -cells, 10-30% of obese individuals maintain glycemic control and are at low risk for developing  
79 diabetes(61). These low-risk obese individuals have elevated  $\beta$ -cell mass and improved insulin secretion compared  
80 to BMI-matched diabetic-obese individuals(2, 9, 75, 90). Understanding the differences in  $\beta$ -cell physiology  
81 between these populations may reveal therapeutic strategies for maintaining and improving glycemic control in  
82 obese individuals.

83 Recent work suggests  $\beta$ -cells do not respond uniformly to glycemic stress, rather they experience variable fates  
84 including dedifferentiation, replication, and apoptosis(10, 18, 34). Understanding how these changes mediate  
85 diabetic risk is complicated by  $\beta$ -cells heterogeneity.  $\beta$ -cell populations include subtypes that specialize in basal  
86 insulin secretion,  $\beta$ -cell replication, coordinating “hub” cells, and  $\beta$ -cells derived from transdifferentiated  $\alpha$ -cells,  
87 each of which differ in glycemic stress response(31, 42, 81, 88). Thus, determining what differentiates nondiabetic-  
88 obese and diabetic-obese populations requires connecting  $\beta$ -cell subtypes to their fate in prolonged glycemic stress.

89 Like in humans, diabetic risk in obese mice depends on genetic background(44, 48, 80). Variation in  $\beta$ -cell  
90 heterogeneity likely underlies variability in islet stress response, and thus needs to be accounted for when comparing  
91 nondiabetic-obese and diabetic-obese populations. Loss of function mutations in leptin (*ob/ob*) and leptin receptor  
92 (*db/db*) provide insight into  $\beta$ -cell physiology in nondiabetic-obese and diabetic-obese states within individual  
93 mouse strains(8, 40, 46, 53), however leptin and its receptor play a critical role in  $\beta$ -cell function independent of  
94 obesity, limiting interpretations of these studies(22). No current mouse model is well-suited to examine  
95 physiological differences in  $\beta$ -cell health between nondiabetic-obese and diabetic-obese states.

96 The SM/J inbred mouse strain has traditionally been used to study interactions between diet and metabolism,  
97 and more recently has uncovered genetic architecture underlying diet-induced obesity and glucose homeostasis(17,  
98 49–52, 63). After 20 weeks on a high fat diet, SM/J mice display characteristics of diabetic-obese mice, including

99 elevated adiposity, hyperglycemia, and glucose intolerance(27). We have previously shown that by 30 weeks of  
100 age, high fat-fed SM/J mice enter diabetic remission, characterized by normalized fasting blood glucose, and greatly  
101 improved glucose tolerance and insulin sensitivity(11). Importantly, these changes occur in the context of sustained  
102 obesity. Given the central role of  $\beta$ -cell health in susceptibility to diabetic-obesity, we hypothesize that obese SM/J  
103 mice undergo restoration of functional  $\beta$ -cell mass during the resolution of hyperglycemia. This study focuses on  
104 how insulin homeostasis,  $\beta$ -cell morphology, and  $\beta$ -cell function change during this remarkable transition and  
105 establishes SM/J mice as a useful model for teasing apart diabetic-obese and nondiabetic-obese states.

106

## 107 **Methods**

108 *Animal husbandry and tissue collection.* SM/J mice were obtained from The Jackson Laboratory (Bar Harbor, ME).  
109 Experimental animals were generated at the Washington University School of Medicine and all experiments were  
110 approved by the Institutional Animal Care and Use Committee in accordance with the National Institutes of Health  
111 guidelines for the care and use of laboratory animals. Mice were weaned onto a high fat diet (42% kcal from fat;  
112 Envigo Teklad TD88137) or an isocaloric low fat diet (15% kcal from fat; Research Diets D12284), as previously  
113 described(11). At 20 or 30 weeks of age, mice were fasted for 4 hours, and blood glucose was measured via  
114 glucometer (GLUCOCARD). Mice were then injected with an overdose of sodium pentobarbital, followed by a toe  
115 pinch to ensure unconsciousness. Blood was collected via cardiac puncture and pancreas was detached from the  
116 spleen and duodenum.

117 *Serum and pancreatic insulin measurements.* Blood obtained via cardiac puncture was spun at 6000 rpm at 4°C for  
118 20 minutes to separate plasma, which was collected and stored at -80 °C. Whole pancreas was homogenized in acid  
119 ethanol and incubated at 4°C for 48 hours, shaking. Homogenate was centrifuged at 2500 rpm for 30 min at 4°C.  
120 Supernatant was collected and stored at -20°C. Protein content was measured using Pierce BCA Protein Assay kit  
121 (Thermo Scientific) according to manufacturer's instructions and read at 562 nm on the Synergy H1 Microplate  
122 Reader (Biotek). Insulin ELISA (ALPCO 80-INSMR-CH01) was used to measure plasma and pancreatic insulin  
123 levels following manufacturer's instructions.

124 *Insulin Tolerance Test.* At 19 or 29 weeks of age, mice were fasted for 4 hours prior to procedure. Insulin (humulin)  
125 was prepared by mixing 10 ul insulin with 10 ml sterile saline. Mice were injected with 3.75 ul insulin mixture/g  
126 bodyweight. Blood glucose levels were assessed from a tail nick at times = 0, 15, 30, 60, and 120 minutes via  
127 glucometer (GLUCOCARD).

128 *Islet Histology and Analyses.* At the time of tissue collection, whole pancreas was placed in 3 mL of neutral buffered  
129 formalin. These samples were incubated at 4°C while gently shaking for 24 hours. Immediately afterwards, samples  
130 were placed into plastic cages and acclimated to 50% EtOH for 1 hour. Samples were then processed into paraffin  
131 blocks using a Leica tissue processor with the following protocol: 70% EtOH for 1 hour x 2, 85% EtOH for 1 hour,  
132 95% EtOH for 1 hour x 2, 100% EtOH for 1 hour x 2, Xylenes for 1 hour x 2, paraffin wax. Pancreas blocks were  
133 sectioned into 4 µm thick sections. Four samples per individual were randomly selected, at least 100 µm apart.

134 Slides were incubated at 60°C for 1 hour, then placed in xylenes to remove remaining paraffin wax. Slides were  
135 then rehydrated using successive decreasing EtOH concentrations (xylenes x 2, 50% EtOH in xylenes, 100% EtOH  
136 x 2, 95% EtOH, 70% EtOH, 50% EtOH, H<sub>2</sub>O). Slides were incubated in sodium citrate (pH 6) at 85°C for 30  
137 minutes, then submerged in running water for 5 minutes. Slides were washed with 0.025% Triton X-100 in TBS  
138 and blocked in 10% normal donkey serum for 1 hour (Abcam ab7475), followed by incubation with primary  
139 antibody overnight at 4°C. [Primary antibodies: rat anti-insulin (1:100, R&D MAB1417), mouse anti-glucagon  
140 (1:100, Abcam ab10988), and rabbit anti-phospho-histone H3 (1:100, Sigma SAB4504429)]. After an additional  
141 wash, secondary antibody was applied for 1 hour at room temperature. [Secondary antibodies: donkey anti-rabbit  
142 488 (1:1000, Abcam ab150061), donkey anti-mouse 647 (1:1000, Abcam ab150107), and donkey anti-rat 555  
143 (1:1000, Abcam ab 150154)]. Fluoroshield Mounting Medium with DAPI (Abcam) was applied to seal the coverslip  
144 and slides were stored at 4°C. Imaging was performed using the Zeiss AxioScan .Z1 at 20X magnification and  
145 94.79% laser intensity.

146 Background was subtracted from DAPI, insulin, glucagon, and phospho-histone H3 images using ImageJ. DAPI  
147 channel was used to identify total nuclei in CellProfiler. Insulin and glucagon channels were combined and overlaid  
148 on the DAPI image to identify islet nuclei. Insulin (INS<sup>+</sup>) staining overlaid with DAPI identified β-cell cells,

149 glucagon (GCG<sup>+</sup>) staining overlaid with DAPI identified  $\alpha$ -cells. Phosphohistone H3 (PHH3<sup>+</sup>) staining identified  
150 mitotic nuclei. Total nuclei, islet cells,  $\beta$ -cells,  $\alpha$ -cells, and mitotic nuclei were summed across 4 slides for each  
151 individual. Islet,  $\beta$ -cell, and  $\alpha$ -cell mass is reported as fraction of total nuclei. Mitotic islet index is reported as  
152 proportion of  $\beta$ -cells and  $\alpha$ -cells positive for phosphohistone H3. Islets with diameter < 50  $\mu$ m were discarded.

153 *Islet isolation.* Pancreas was removed and placed in 8mL HBSS buffer on ice. Pancreas was then thoroughly minced.  
154 Collagenase P (Roche) was added to a final concentration of 0.75 mg/ml. Mixture was then shaken in a 37°C water  
155 bath for 10-14 minutes. Mixture was spun at 1500 rpm for 2 minutes. The pellet was washed twice with HBSS. The  
156 pellet was re-suspended in HBSS and transferred a petri dish. Hand-selected islets were placed in sterile-filtered  
157 RPMI with L-glutamine (Gibco) containing 11mM glucose, supplemented with 5% pen/strep and 10% Fetal Bovine  
158 Serum (Gibco). Islets were rested overnight in a cell culture incubator set to 37°C with 5% CO<sub>2</sub>.

159 *Glucose Stimulated Insulin Secretion and Islet Insulin Content.* Islets of roughly equal size were equilibrated in  
160 KRBH buffer containing 2.8 mM glucose for 30 minutes at 37°C. 5 islets were hand selected and placed in 150  $\mu$ l  
161 KRBH containing either 2.8 or 11 mM glucose. Tubes were placed in a 37°C water bath for 45 min. Islets were  
162 then spun at 2000 x g, hand-picked with a pipette, and transferred from the secretion tube and placed in the content  
163 tube with acid ethanol. The content and secretion tubes were stored at -20°C overnight. Each condition was  
164 performed in duplicate for each individual. Mouse insulin ELISA (ALPCO 80-INSMU-E01) was performed  
165 according to manufacturer's instructions, with the secretion tubes diluted 1:5, and content tubes diluted 1:100.  
166 Normalized insulin secretion was calculated by dividing the secreted value by the content value. Glucose stimulated  
167 insulin secretion was calculated by dividing the normalized insulin secretion at 11mM glucose by the normalized  
168 insulin secretion at 2.8 mM glucose. Each sample was measured in duplicate. Total islet protein within each content  
169 tube was measured using Pierce BCA Protein Assay kit (Thermo Scientific) according to manufacturer's  
170 instructions and read at 562 nm on the Synergy H1 Microplate Reader (Biotek). Islet insulin content was calculated  
171 by dividing the insulin level in the content tubes by the total protein value.

172 *Statistical analyses.* Phenotypes were assessed for normality by a Shapiro-Wilk test, and outliers removed. A  
173 student's t-test was used to assess significance between two cohorts, while a one-way ANOVA with Tukey's Post

174 Hoc test was used to assess significance among multiple cohorts. Pearson's correlation was used to determine  
175 strength of correlation among variables. P-values < 0.05 were considered significant.

## 176 **Results**

177 *Obese SM/J mice increase insulin levels and improve insulin sensitivity.* The resiliency of  $\beta$ -cells distinguishes  
178 nondiabetic-obese and diabetic-obese individuals(8, 46, 47, 63, 66, 72, 74, 81). While both groups develop  
179 hyperinsulinemia, diabetic-obese individuals become insulin resistant, leading to  $\beta$ -cell dysfunction,  
180 hypoinsulinemia, and hyperglycemia. Our previous work shows that obese SM/J mice spontaneously transition  
181 from hyperglycemic to normoglycemic with age(11). Principle to this is a 40 mg/dl decrease in fasting glucose  
182 levels in high fat-fed SM/J mice between 20 and 30-weeks (Fig. 1A). We first sought to characterize how insulin  
183 homeostasis changes during this transition. Interestingly, 20-week high fat-fed SM/J mice have comparable levels  
184 of plasma and pancreatic insulin levels compared to age-matched low fat-fed mice (Fig. 1B-C). By 30 weeks, high  
185 fat-fed SM/J mice increase circulating insulin levels 5.3-fold and pancreatic insulin levels 1.9-fold, in line with  
186 other models of hyperinsulinimic nondiabetic-obesity(33, 36, 55). We sought to test for peripheral insulin resistance  
187 via an insulin tolerance test (ITT), as insulin resistance is a known mechanism for increasing circulating and  
188 pancreatic insulin levels. Surprisingly, 20-week high fat-fed SM/J mice display insulin resistance compared to low  
189 fat-fed mice, however, insulin sensitivity is restored by 30 weeks (Fig. 1D-E). The simultaneous increase in insulin  
190 production and improved insulin sensitivity is unprecedented and suggests a novel mechanism beyond insulin  
191 resistance for enhancing  $\beta$ -cell insulin secretion.

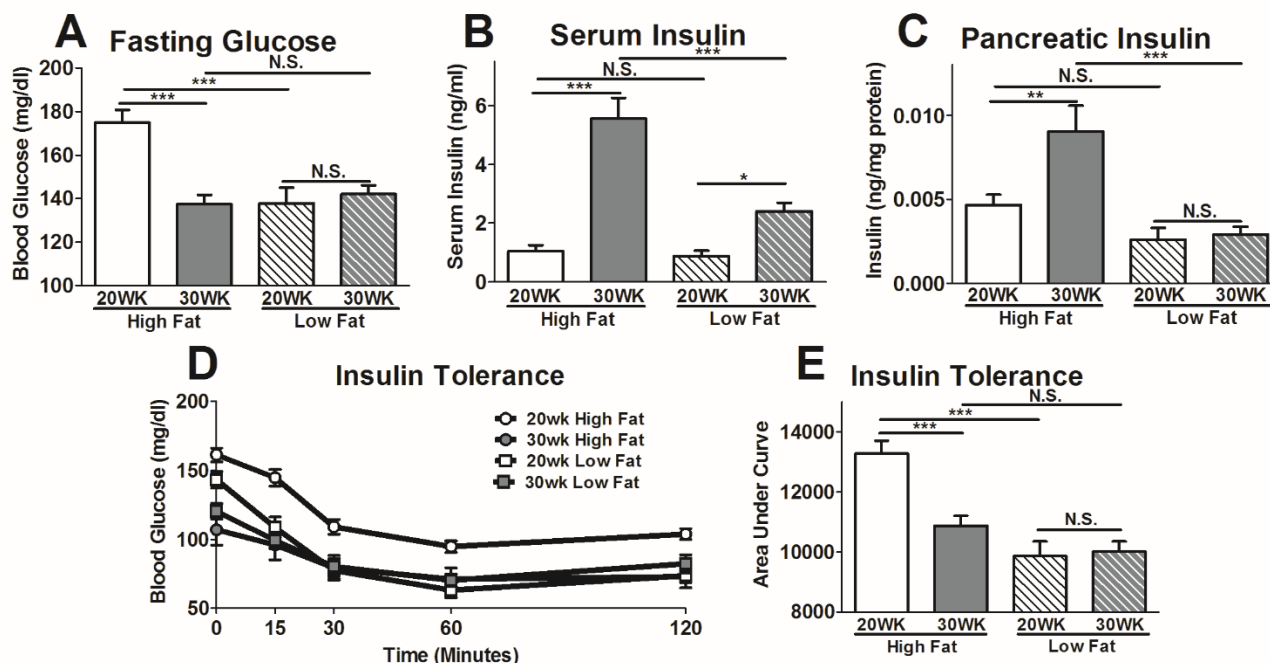

192

193 **Figure 1.** Insulin homeostasis during the resolution of hyperglycemia in obese SM/J mice. Blood glucose levels  
 194 measured after 4-hour fast from high and low fat-fed, 20- and 30-week SM/J mice (A). Plasma insulin (B) and  
 195 pancreatic insulin levels (C) assessed via insulin ELISA, collected after 4-hour fast. Insulin tolerance test performed  
 196 via intraperitoneal insulin injection following 4-hour fast (D), summarized in the area under the curve (E). N = 38-  
 197 50 for panel A, C, D. N = 10-24 for panel B-C, equal numbers of males and females. Bar represents group means,  
 198 error bars represent SEM. \*p<0.05, \*\*p<0.01, \*\*\*p<0.001, N.S. Not Significant.  
 199

200 *Obese SM/J mice increase islet mass during resolution of hyperglycemia.* In humans and mice, obesity initially  
 201 increases islet mass, and maintenance of that mass in part differentiates nondiabetic-obese individuals from diabetic-  
 202 obese individuals(2, 9, 25, 59, 76, 85). To understand the source of increased insulin production in obese SM/J  
 203 mice, we examined islet morphology during the resolution of hyperglycemia. To quantify islet mass and number,  
 204  $\beta$ -cell mass,  $\alpha$ -cell mass, and mitotic index, we randomly selected 4 sections per fixed pancreas and stained with  
 205 antibodies against insulin, glucagon, and phospho-histone H3. Representative images of immuno-stained pancreatic  
 206 sections for 30-week high fat-fed mice and 30-week low fat-fed mice are shown in Figure 2A-B. Consistent with  
 207 other mouse models of obesity, 20-week high fat-fed SM/J mice have a 2.75-fold increase in total islet mass  
 208 compared to low fat-fed mice (Fig. 2C). This increased mass is driven by an increase in both median islet area and  
 209 number of islets (Fig. 2D-E). Islet mass is further elevated 2-fold between 20- and 30-weeks in high fat-fed mice,



210 while the islet population remains unchanged in low fat-fed mice. A full summary of the islet quantification is  
211 presented in Supplemental Table 1. Distribution of islet size is shown in Supplemental Figure 1, along with  
212 corresponding density plot for each cohort. Islet mass correlates with BMI in obese humans(26), a similar  
213 correlation is seen between islet mass and body weight in high fat-fed SM/J mice (Fig. 2F).

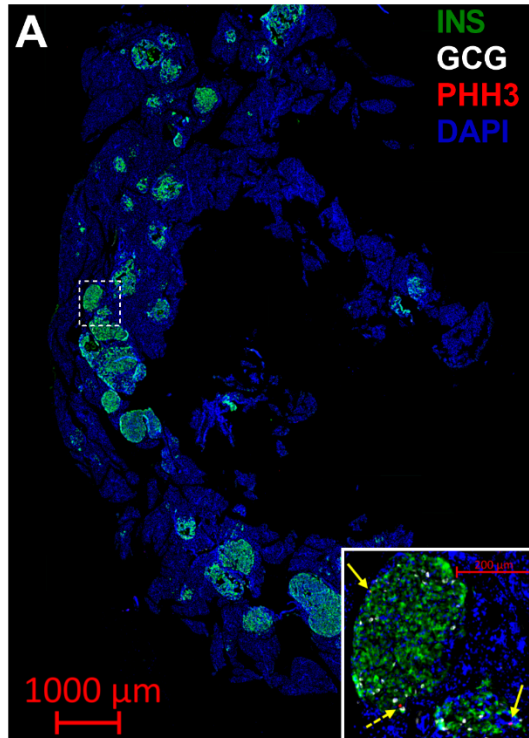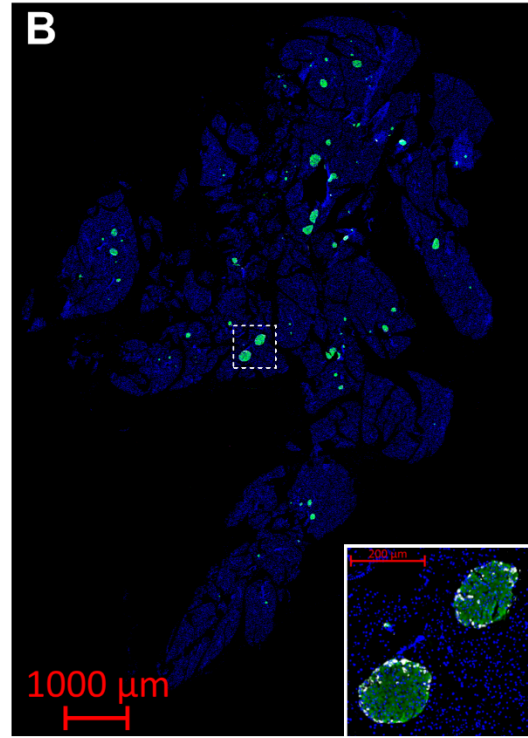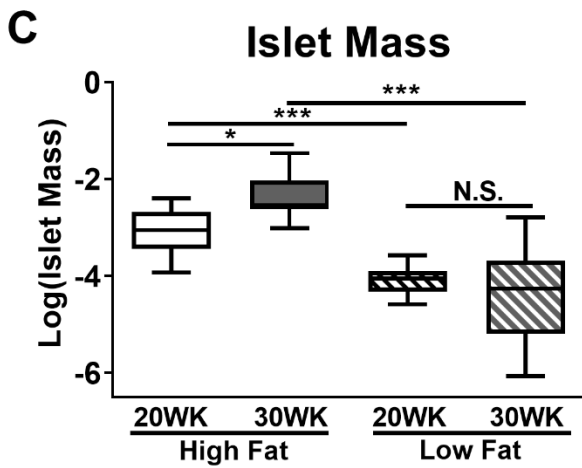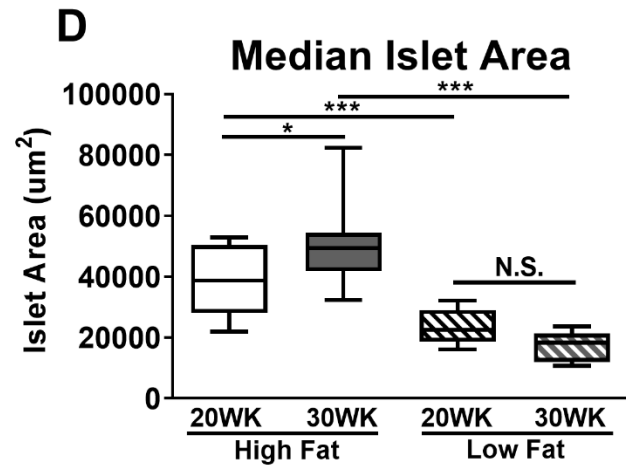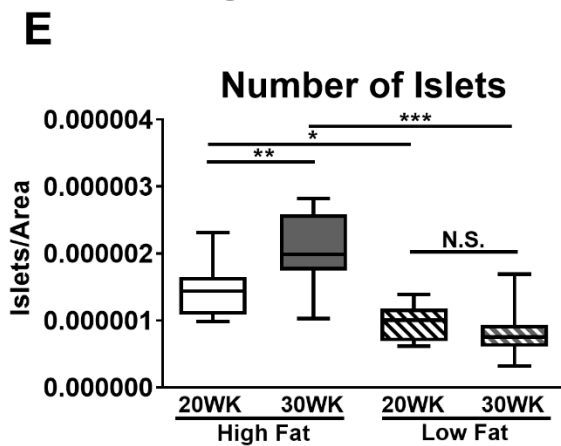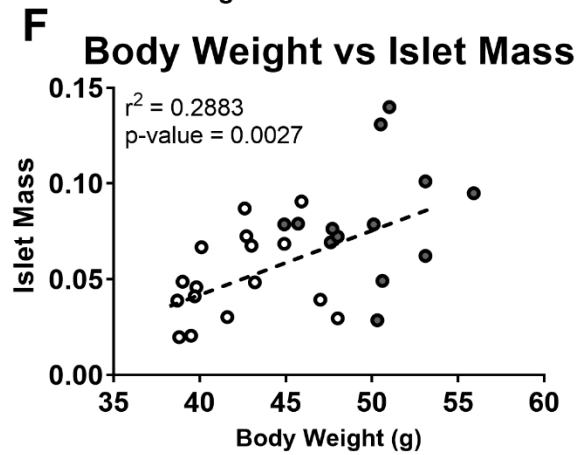

215

216 **Figure 2.** Changes in islet mass during the resolution of hyperglycemia. Representative pancreatic cross sections  
217 from 30-week high fat-fed mice (**A**) and 30-week low fat-fed mice (**B**) stained for insulin (green), glucagon (white),  
218 and phosphohistone H3 (red). Dashed white box identifies location of image in inset. Solid yellow arrows within  
219 inset identify  $INS^+ : PHH3^+$  cells, dashed yellow arrow identifies  $GCG^+ : PHH3^+$  cell. Islet mass reported as ratio of  
220 islet cells over total cells, summed across 4 pancreatic sections (**C**). Median islet area calculated for each individual  
221 across 4 sections (**D**). Total number of islets quantified per individual, normalized by total DAPI area (**E**).  
222 Correlation between body weight and  $\beta$ -cell mass in high fat-fed mice (**F**), open circles – 20-week high fat-fed,  
223 filled circles – 30-week high fat-fed. N = 12-16 per cohort, equal number of males and females. \* $p < 0.05$ , \*\* $p < 0.01$ ,  
224 \*\*\* $p < 0.001$ , N.S. Not Significant.

225

226 *Obese SM/J mice increase  $\beta$ -cell mass and  $\alpha$ -cell replication.* To identify the source of the increased islet mass in  
227 high fat-fed SM/J mice, we quantified  $\beta$ -cell and  $\alpha$ -cell mass within each cohort. Increased islet mass in 20-week  
228 high fat-fed mice is driven by a 3.3-fold increase in  $\beta$ -cell mass and a 2.5-fold increase in  $\alpha$ -cell mass compared to  
229 low fat mice, while growth between 20- and 30-week high fat-fed mice is driven by a further 2.2-fold increase in  
230  $\beta$ -cell mass (Fig. 3A-B). In obesity, islet mass expands primarily through  $\beta$ -cell replication (34, 68, 85, 92). We  
231 quantified mitotic index of  $\beta$ - and  $\alpha$ -cells in our model using phosphohistone H3 and assessed how mitotic index  
232 relates to  $\beta$ -cell mass during the resolution of hyperglycemia in obese SM/J mice. Surprisingly, calculation of  $\beta$ -  
233 cell mitotic index reveals similar rates of  $\beta$ -cell replication across cohorts (Fig. 3C), while  $\alpha$ -cell mitotic index is  
234 elevated 6-fold in high fat-fed mice compared to low fat-fed controls (Fig. 3D). Examining the relationship between  
235  $\beta$ -cell mitotic index and  $\beta$ -cell mass in high fat-fed mice reveals  $\beta$ -cell replication correlates with  $\beta$ -cell mass in 20-  
236 week mice, but not 30-week mice (Fig. 3E-F).

237

238

239

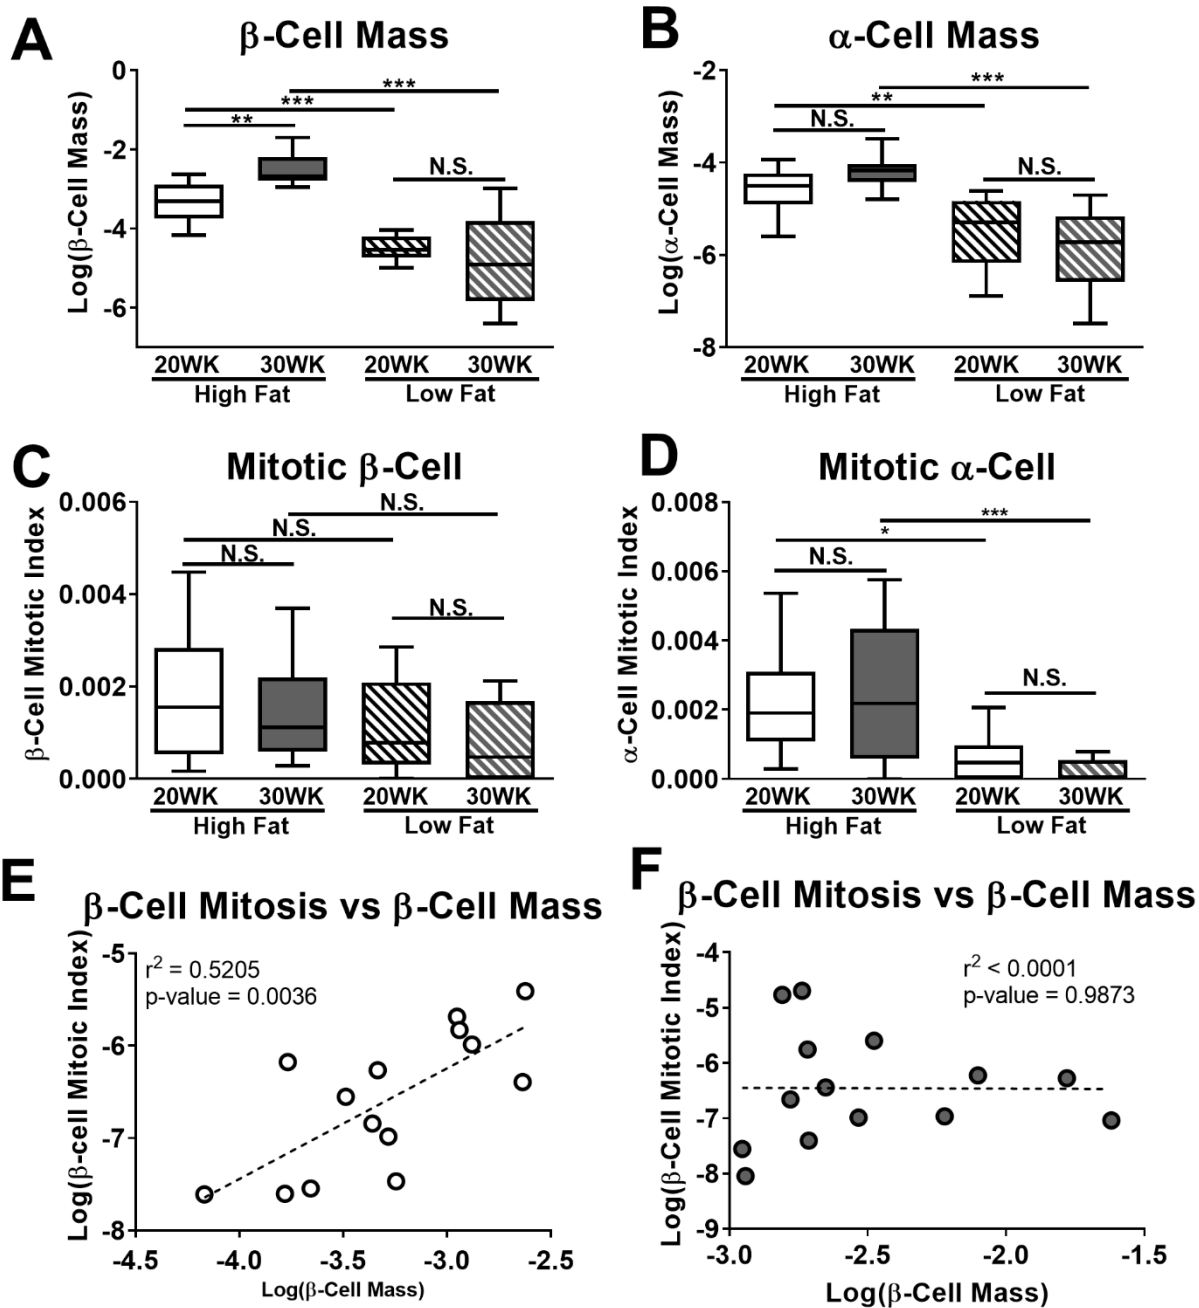

240  
 241  
 242  
 243  
 244  
 245  
 246  
 247  
 248  
 249

**Figure 3.** Islet cell mass and mitotic index in obese SM/J mice.  $\beta$ -cell mass reported as ratio of  $INS^+$  cells divided by total cells summed across 4 slides per individual (A).  $\alpha$ -cell mass reported as  $GCG^+$  cells divided by total cells summed across 4 slides per individual (B).  $\beta$ -cell mitotic index calculated by dividing  $INS^+ : PHH3^+$  cells divided by total  $INS^+$  cells summed across 4 slides per individual (C).  $\alpha$ -cell mitotic index calculated by dividing  $GCG^+ : PHH3^+$  cells by total  $GCG^+$  cells summed across 4 slides (D). Correlation between  $\beta$ -cell mitotic index and  $\beta$ -cell mass in 20 week high fat-fed mice (E) and 30-week high fat-fed mice (F). Open circles – 20-week high fat-fed, filled circles – 30-week high fat-fed. N = 12-16 per cohort, equal males and females. \* $p < 0.05$ , \*\* $p < 0.01$ , \*\*\* $p < 0.001$ , N.S. Not Significant.

250 *Obese SM/J mice increase islet insulin secretion and insulin content.* In conjunction with changing  $\beta$ -cell  
251 morphology, diabetic-obesity is associated with altered  $\beta$ -cell function, including diminished first phase insulin  
252 secretion, increased basal insulin secretion, and decreased  $\beta$ -cell insulin production (16, 23, 57, 66). We sought to  
253 examine if changes in  $\beta$ -cell insulin secretion and content corresponded with the resolution of hyperglycemia and  
254 expanded  $\beta$ -cell mass we observe. To test this, we isolated islets from high and low fat-fed 20- and 30-week SM/J  
255 mice. After allowing islets to rest overnight, we performed a glucose-stimulated insulin secretion assay by  
256 subjecting islets to low (2.8 mM) or high (11 mM) glucose conditions. We find that high fat-fed SM/J mice  
257 dramatically improve glucose-stimulated insulin secretion between 20 and 30 weeks of age. This includes  
258 transitioning from blunted insulin secretion under high glucose conditions to appropriately elevated secretion (Fig.  
259 4A), and improvement in the ratio of insulin secreted in response to high vs low glucose conditions (Fig. 4B). 20-  
260 week high fat-fed mice have elevated insulin secretion in response to low glucose (Fig. 4C), consistent with other  
261 studies of islets in type 2 diabetic humans and mice. Correspondingly, 20-week high fat-fed SM/J mice have  
262 decreased islet insulin content (Fig. 4D), which increases 3-fold by 30 weeks. Consistent with current understanding  
263 of the  $\beta$ -cell maturation process(76), there is a positive correlation between obese SM/J islet insulin content and  
264 glucose-stimulated insulin secretion (Fig. 4E). This suggests that obese SM/J mice experience  $\beta$ -cell maturation  
265 between 20 and 30 weeks, characterized by increased insulin content and improved insulin secretion in response to  
266 high glucose. This spontaneous improvement in  $\beta$ -cell health and function in the context of obesity has not been  
267 reported in other mouse strains, suggesting a genetic basis unique to SM/J.

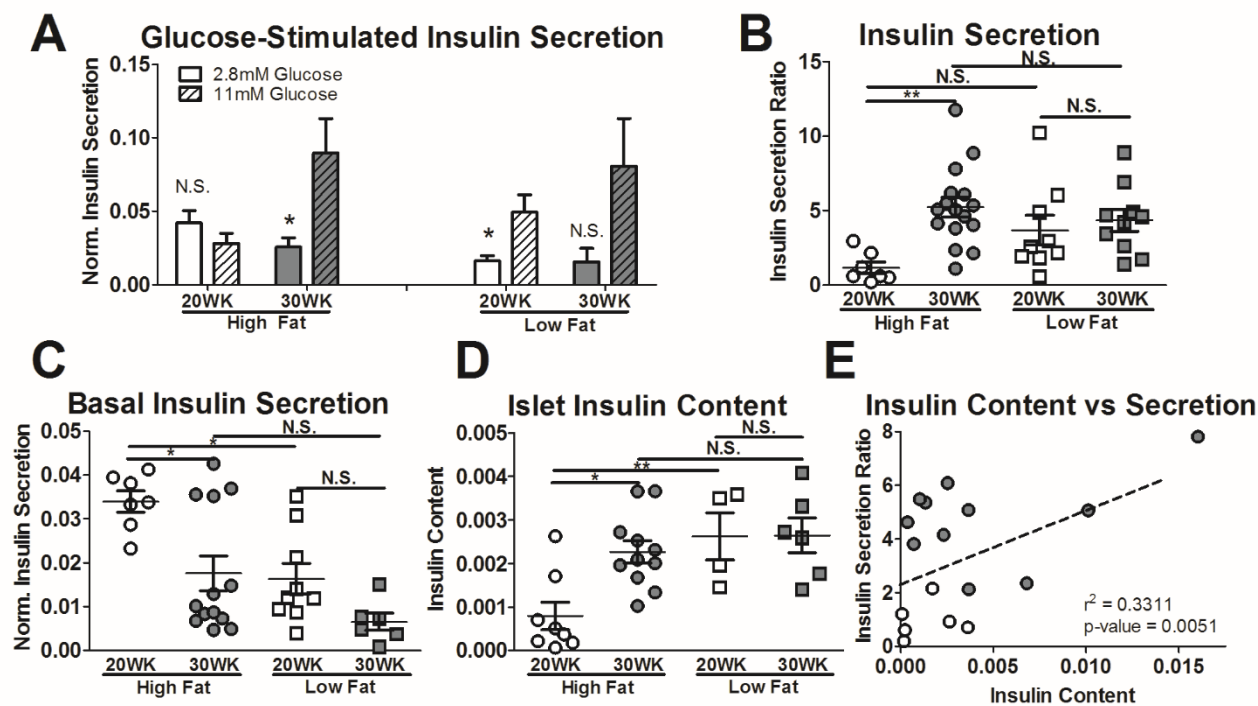

268

269 **Figure 4.** Islet insulin secretion and insulin content. Islet insulin secretion in response to low (2.8 mM) and high  
 270 (11mM) glucose conditions, normalized by islet insulin content (A), reported as a ratio of high glucose to low  
 271 glucose insulin secretion (B). Comparison of islet insulin secretion under low glucose conditions in 20- and 30-  
 272 week, high and low fat-fed mice (C). Islet insulin content normalized by total protein measured via protein BCA  
 273 (D). Correlation between insulin secretion ratio and islet insulin content (E). Open circles – 20-week high fat-fed,  
 274 closed circles – 30-week high fat-fed. \* $p < 0.05$ , \*\* $p < 0.01$ , \*\*\* $p < 0.001$ , N.S. Not Significant.

275  
276

## 277 Discussion

278 The ability to maintain appropriate insulin production and secretion, termed functional  $\beta$ -cell mass,  
 279 is a central determinant of diabetic risk. In this study, we describe insulin homeostasis, islet morphology,  
 280 and  $\beta$ -cell function in obese SM/J mice as they transition from hyperglycemic to normoglycemic. We  
 281 determine that increased insulin production and insulin sensitivity accompany improved glycemic control,  
 282 driven by expanded  $\beta$ -cell mass and improved glucose-stimulated insulin secretion. Our results show  
 283 obese SM/J mice undergo restoration of functional  $\beta$ -cell mass, providing an opportunity to explore how  
 284 compensatory insulin production can be achieved in the context of obesity.

285           Susceptibility to high fat diet-induced diabetes in mice depends on genetic background. Several  
286 strains and sub-strains develop diabetic-obesity, including hyperglycemia, glucose intolerance, and insulin  
287 resistance, consistent with the diabetic phenotypes observed in obese SM/J mice at 20 weeks (3, 44, 83).  
288 Remarkably, by 30 weeks, obese SM/J mice have characteristics of diabetic-resistant obese strains,  
289 retaining glycemic control by dramatically increasing insulin production and improving insulin sensitivity  
290 (3, 79, 83). To our knowledge, this is the first report of transient hyperglycemia in an inbred strain,  
291 although similar phenomena have been reported in mice with the leptin receptor (*db/db*) mutation.  
292 C57bl/6J (*db/db*) and 129/J (*db/db*) mice are obese and initially develop mild hyperglycemia at 8-10 weeks of  
293 age, but this resolves by 20-30 weeks, concurrent with increased insulin production and  $\beta$ -cell mass(40,  
294 54). Unfortunately, leptin and its receptor play an important role in  $\beta$ -cell growth and function independent  
295 of obesity, which confounds understanding of how genetic background mediates diabetic risk in  
296 obesity(22).

297           High fat diet-induced obesity in mice can result in increased islet mass, no change, or decreased  
298 mass (3, 39, 66, 79). Across these studies, inability to expand islet mass is associated with hyperglycemia.  
299 In humans, islet mass correlates with BMI in nondiabetic obese-individuals, while diabetic-obese  
300 individuals have low islet mass compared to nondiabetic individuals (26, 47, 54). High fat-fed SM/J mice  
301 are unique because they have expanded islet mass at 20 weeks, yet normal insulin levels and insulin  
302 resistance. By 30-weeks, islet mass continues to expand, driven by increased islet area and increased islet  
303 number, corresponding with increased insulin production and improved insulin sensitivity. Islet  
304 neogenesis may contribute to the increased islet number, and fission of large islets has been reported  
305 during development, suggesting islets have mechanisms to maintain an appropriate size(41, 80).

306            $\beta$ -cell expansion is the primary driver of islet expansion in mouse models of obesity(8, 46). Some  
307 nondiabetic obese mice experience increased  $\beta$ -cell mass, but do not show evidence for elevated  $\beta$ -cell

308 replication in immunostaining of pancreatic sections(38, 83). This has been attributed to islets in the tail  
309 of the pancreas being substantially more proliferative in response to high fat diet than the body and head  
310 regions(28), thus technical artifacts in sampling could result in inflated variances which mask biological  
311 differences. This is could be the case here, given that high fat-fed SM/J's  $\beta$ -cell mass is far above low fat-  
312 fed controls, that their  $\beta$ -cell mass expands 2-fold during the resolution of hyperglycemia, yet we find no  
313 evidence for increased  $\beta$ -cell replication. However,  $\alpha$ -cell mass also expands in obesity (29, 37, 61). While  
314  $\alpha$ -cell mass is elevated in high fat-fed SM/J mice compared to low fat-fed controls, we find it does not  
315 change between 20 and 30 weeks, despite substantial elevation of  $\alpha$ -cell mitotic index.

316 Retention of  $\beta$ -cell function separates diabetic-obesity and nondiabetic obesity (5, 35, 45). 20-  
317 week high fat-fed SM/J mice have an insulin secretion profile similar to diabetic-obese mice and humans,  
318 including blunted glucose-stimulate insulin release, elevated basal insulin secretion, and low islet insulin  
319 content, which resolves by 30 weeks. Underscoring this transition is the positive correlation between  
320 glucose-stimulated insulin release and islet insulin content. Care was taken to select normal sized islets  
321 across all cohorts for functional assessment ( $\sim 100\mu\text{m}$  in diameter) indicating this robust improvement in  
322  $\beta$ -cell functional mass is due to changes to  $\beta$ -cell physiology.

323 Three current, non-mutually exclusive components of  $\beta$ -cell stress response may shed light on the  
324 perplexing improvement in glycemic control seen in SM/J mice:  $\beta$ -cell dedifferentiation, nascent  $\beta$ -cell  
325 maturation, and changes in  $\beta$ -cell subtype proportions. While early studies concluded overworked  $\beta$ -cells  
326 undergo apoptosis (10, 56, 67, 73), recent studies have suggested  $\beta$ -cells dedifferentiate into a  
327 dysfunctional, progenitor-like state, potentially as a defense mechanisms against prolonged glycemic  
328 stress (18, 43, 58, 84). These dedifferentiated  $\beta$ -cells have low insulin content and poor glucose-stimulated  
329 insulin secretion. Further, the dedifferentiated state is reversible in cultured conditions, revealing potential  
330 for therapeutic intervention(24). It is feasible that obese SM/J mice have  $\beta$ -cells in the dedifferentiated



331 state at 20-weeks, which would explain the low insulin content and poor functionality despite the elevated  
332  $\beta$ -cell mass. Improvement in insulin sensitivity could ease glycemic stress, allowing dedifferentiated  $\beta$ -  
333 cells to redifferentiate by 30 weeks, reestablishing insulin production and secretion.

334 Work from several groups suggests  $\beta$ -cells can be divided into two broad categories: functionally  
335 immature and functionally mature cells. Immature  $\beta$ -cells have greater proliferative potential and are  
336 resistant to stress, at the expense of functional maturity (4, 7, 69, 89). These immature  $\beta$ -cells have low  
337 insulin content, high basal insulin secretion, and a lack of glucose stimulated insulin secretion. The large  
338  $\beta$ -cell expansion seen in obese SM/J mice, suggests nascent  $\beta$ -cells must undergo maturation at some  
339 point. We have no evidence of enhanced  $\beta$ -cell replication at 20-weeks, but it is possible these  $\beta$ -cell are  
340 still functionally immature and reach maturity by 30-weeks. This could explain why islets from these mice  
341 lack glucose stimulated insulin release, show elevated basal insulin secretion, and have low insulin  
342 content, despite elevated mass.

343 Recent advances in single cell technology has allowed for identification of  $\beta$ -cell subtypes, based  
344 on functional characteristics and gene expression. These include  $\beta$ -cells that specializes in basal insulin  
345 secretion, characterized by low mature insulin content, and enriched in *db/db* diabetic islets(32). While  
346 these cells are not equipped to respond to elevated glucose, they are enriched for maturity markers  
347 including *Ucn3* and *Glut2*, distinguishing them from immature  $\beta$ -cells. Pancreatic multipotent progenitors  
348 (PMPs) are rare insulin positive cells capable of generating endocrine cells *in vivo* including functionally  
349 mature  $\beta$ -cells(73, 85). These cells resemble immature  $\beta$ -cells, with low insulin content and *Glut2*  
350 expression, whose proliferation is stimulated by glycemic stress in STZ-treated and NOD mouse models.  
351 Lastly,  $\beta$ -cell hub cells coordinate calcium signaling and insulin release of surrounding  $\beta$ -cells(42). These  
352 cells have markers for both mature and immature  $\beta$ -cells, including expression of *Gck* and *Pdx1*, but low  
353 insulin content, and are especially sensitive to glycemic and inflammatory stress. Ablation of these cells

354 results in loss of coordinated insulin release, suggesting they are necessary for mature islet function. Given  
355 the elevated  $\beta$ -cell mass, poor insulin secretion, and low insulin content in 20-week high fat-fed SM/J  
356 mice, it is possible islets are enriched for basal insulin secretors and PMP's, while devoid of hub cells. At  
357 30 weeks, as glycemic stress diminishes, basal insulin secretors and PMP populations decline, while hub  
358 cells rise, reestablishing  $\beta$ -cell functionality.

359         Clearly, the interplay between  $\beta$ -cell dedifferentiation, nascent  $\beta$ -cell maturation, and  $\beta$ -cell  
360 subtype identity in diabetic-obesity needs to be clarified. SM/J mice are a useful model because they allow  
361 for appropriate comparisons across diabetic-obese, nondiabetic-obese, and nondiabetic-lean populations.  
362 Future studies interrogating these differences will provide insight into the physiological mechanisms that  
363 allow  $\beta$ -cell functionality to be maintained and improved in the context of obesity.

364

## 365 **Acknowledgements**

366

### 367 *Author Contributions*

368 HAL and MAM designed the experiments. MAM, CC, HS, and JPW performed mouse phenotyping and ELISAs.  
369 MAM, JMV, and MK performed histological assays and analyses. MAM, JWH, and CLP performed experiments  
370 on isolated islets. MAM wrote the manuscript. All authors edited and approved the final draft.

### 371 *Funding*

372 This work was supported by the Washington University Department of Genetics, the Diabetes Research Center at  
373 Washington University (P30DK020579), the NIH NIDDK (K01 DK095003) to HAL and NIH NIGM (T32  
374 GM007067) and NIH NIDDK (T32 DK108742) to MAM

375 The authors declare no conflicts of interest.

## 376 **References**

- 377 1. **Abdullah A, Peeters A, de Courten M, Stoelwinder J.** The magnitude of association between  
378 overweight and obesity and the risk of diabetes: A meta-analysis of prospective cohort studies. *Diabetes*  
379 *Res Clin Pract* 89: 309–319, 2010.
- 380 2. **Aguayo-Mazzucato C, Bonner-Weir S.** Pancreatic  $\beta$  Cell Regeneration as a Possible Therapy for  
381 Diabetes. *Cell Metab.* 27 Cell Press: 57–67, 2018.
- 382 3. **Andrikopoulos S, Massa CM, Aston-Mourney K, Funkat A, Fam BC, Hull RL, Kahn SE, Proietto J.**  
383 Differential effect of inbred mouse strain (C57BL/6, DBA/2, 129T2) on insulin secretory function in  
384 response to a high fat diet. *J. Endocrinol.* (2005). doi: 10.1677/joe.1.06333.
- 385 4. **Bader E, Migliorini A, Gegg M, Moruzzi N, Gerdes J, Roscioni SS, Bakhti M, Brandl E, Irmeler M,**  
386 **Beckers J, Aichler M, Feuchtinger A, Leitzinger C, Zischka H, Wang-Sattler R, Jastroch M, Tschöp**  
387 **M, Machicao F, Staiger H, Häring H-U, Chmelova H, Chouinard JA, Oskolkov N, Korsgren O,**  
388 **Speier S, Lickert H.** Identification of proliferative and mature  $\beta$ -cells in the islets of Langerhans. *Nature*  
389 535: 430–434, 2016.
- 390 5. **Basu A, Dalla Man C, Basu R, Toffolo G, Cobelli C, Rizza RA.** Effects of type 2 diabetes on insulin  
391 secretion, insulin action, glucose effectiveness, and postprandial glucose metabolism. *Diabetes Care*  
392 (2009). doi: 10.2337/dc08-1826.
- 393 6. **Ben-Othman N, Vieira A, Courtney M, Record F, Gjernes E, Avolio F, Hadzic B, Druelle N,**  
394 **Napolitano T, Navarro-Sanz S, Silvano S, Al-Hasani K, Pfeifer A, Lacas-Gervais S, Leuckx G,**  
395 **Marroquí L, Thévenet J, Madsen OD, Eizirik DL, Heimberg H, Kerr-Conte J, Pattou F, Mansouri**  
396 **A, Collombat P.** Long-Term GABA Administration Induces Alpha Cell-Mediated Beta-like Cell  
397 Neogenesis. *Cell* 168: 73-85.e11, 2017.
- 398 7. **Blum B, Hrvatin S, Schuetz C, Bonal C, Rezanian A, Melton DA.** Functional beta-cell maturation is  
399 marked by an increased glucose threshold and by expression of urocortin 3. *Nat. Biotechnol.* (2012). doi:  
400 10.1038/nbt.2141.
- 401 8. **Bock T, Pakkenberg B, Buschard K.** *Increased Islet Volume but Unchanged Islet Number in ob/ob*  
402 *Mice.* 2003.
- 403 9. **Butler AE, Janson J, Bonner-Weir S, Ritzel R, Rizza RA, Butler PC.**  $\beta$ -Cell Deficit and Increased  $\beta$ -  
404 Cell Apoptosis in Humans With Type 2 Diabetes. *Diabetes* 52: 102–110, 2003.
- 405 10. **Butler AE, Janson J, Bonner-Weir S, Ritzel R, Rizza RA, Butler PC.** Beta-cell deficit and increased  
406 beta-cell apoptosis in humans with type 2 diabetes. *Diabetes* 52: 102–10, 2003.
- 407 11. **Carson C, Miranda MA, Macias-Velasco JF, Gunawardana S, Hughes J, Oyama S, Kunzmann M,**  
408 **Schmidt H, Wayhart JP, Lawson HA.** Natural brown adipose expansion and remission of hyperglycemia  
409 in obese SM/J mice. *bioRxiv* ( August 5, 2019). doi: 10.1101/724369.
- 410 12. **Centers for Disease Control and Prevention C.** National Diabetes Statistics Report: Estimates of  
411 Diabetes and Its Burden in the United States. Atlanta, GA: Centers for Disease Control and Prevention;  
412 2017. *US Dep Heal Hum Serv* : 2009–2012, 2017.
- 413 13. **Chakravarthy H, Gu X, Enge M, Dai X, Wang Y, Damond N, Downie C, Liu K, Wang J, Xing Y,**  
414 **Chera S, Thorel F, Quake S, Oberholzer J, Macdonald PE, Herrera PL, Kim SK.** Converting adult  
415 pancreatic islet  $\alpha$ -cells into  $\beta$ -cells by targeting both Dnmt1 and Arx HHS Public Access. *Cell Metab* 25:  
416 622–634, 2017.
- 417 14. **Chakravarthy H, Gu X, Enge M, Dai X, Wang Y, Damond N, Downie C, Liu K, Wang J, Xing Y,**  
418 **Chera S, Thorel F, Quake S, Oberholzer J, MacDonald PE, Herrera PL, Kim SK.** Converting Adult  
419 Pancreatic Islet  $\alpha$  Cells into  $\beta$  Cells by Targeting Both Dnmt1 and Arx. *Cell Metab* 25: 622–634, 2017.
- 420 15. **Chatterjee S, Khunti K, Davies MJ.** Type 2 diabetes. *Lancet (London, England)* 389: 2239–2251, 2017.
- 421 16. **Cheng K, Andrikopoulos S, Gunton JE.** First phase insulin secretion and type 2 diabetes. [Online]. *Curr*  
422 *Mol Med* 13: 126–39, 2013. <http://www.ncbi.nlm.nih.gov/pubmed/22834840> [2 Aug. 2019].
- 423 17. **Cheverud JM, Lawson HA, Fawcett GL, Wang B, Pletscher LS, R Fox A, Maxwell TJ, Ehrlich TH,**  
424 **Kenney-Hunt JP, Wolf JB, Semenkovich CF.** Diet-dependent genetic and genomic imprinting effects on  
425 obesity in mice. *Obesity (Silver Spring)* 19: 160–70, 2011.
- 426 18. **Cinti F, Bouchi R, Kim-Muller JY, Ohmura Y, Sandoval PR, Masini M, Marselli L, Suleiman M,**  
427 **Ratner LE, Marchetti P, Accili D.** Evidence of  $\beta$ -cell dedifferentiation in human type 2 diabetes. *J Clin*

- 428 *Endocrinol Metab* 101: 1044–1054, 2016.
- 429 19. **Colditz GA, Willett WC, Rotnitzky A, Manson JE.** Weight Gain as a Risk Factor for Clinical Diabetes  
430 Mellitus in Women. *Ann Intern Med* 122: 481, 1995.
- 431 20. **Collombat P, Xu X, Ravassard P, Sosa-Pineda B, Dussaud S, Billestrup N, Madsen OD, Serup P,**  
432 **Heimberg H, Mansouri A.** The ectopic expression of Pax4 in the mouse pancreas converts progenitor  
433 cells into alpha and subsequently beta cells. *Cell* 138: 449–62, 2009.
- 434 21. **Courtney M, Gjernes E, Druelle N, Ravaud C, Vieira A, Ben-Othman N, Pfeifer A, Avolio F, Leuckx**  
435 **G, Lacas-Gervais S, Burel-Vandenbos F, Ambrosetti D, Hecksher-Sorensen J, Ravassard P,**  
436 **Heimberg H, Mansouri A, Collombat P.** The Inactivation of Arx in Pancreatic  $\alpha$ -Cells Triggers Their  
437 Neogenesis and Conversion into Functional  $\beta$ -Like Cells. *PLoS Genet.* (2013). doi:  
438 10.1371/journal.pgen.1003934.
- 439 22. **Covey SD, Wideman RD, McDonald C, Unniappan S, Huynh F, Asadi A, Speck M, Webber T, Chua**  
440 **SC, Kieffer TJ.** The pancreatic b cell is a key site for mediating the effects of leptin on glucose  
441 homeostasis. doi: 10.1016/j.cmet.2006.09.005.
- 442 23. **Deng S, Vatamaniuk M, Huang X, Doliba N, Lian MM, Frank A, Velidedeoglu E, Desai NM,**  
443 **Koeberlein B, Wolf B, Barker CF, Naji A, Matschinsky FM, Markmann JF.** Structural and Functional  
444 Abnormalities in the Islets Isolated from Type 2 Diabetic Subjects. *Diabetes* (2004). doi:  
445 10.2337/diabetes.53.3.624.
- 446 24. **Diedisheim M, Oshima M, Albagli O, Huldt CW, Ahlstedt I, Clausen M, Menon S, Aivazidis A,**  
447 **Andreasson AC, Haynes WG, Marchetti P, Marselli L, Armanet M, Chimienti F, Scharfmann R.**  
448 Modeling human pancreatic beta cell dedifferentiation. *Mol Metab* 10: 74–86, 2018.
- 449 25. **Dimas AS, Lagou V, Barker A, Knowles JW, Mägi R, Hivert M-F, Benazzo A, Rybin D, Jackson**  
450 **AU, Stringham HM, Song C, Fischer-Rosinsky A, Boesgaard TW, Grarup N, Abbasi FA, Assimes**  
451 **TL, Hao K, Yang X, Lecoeur C, Barroso I, Bonnycastle LL, Böttcher Y, Bumpstead S, Chines PS,**  
452 **Erdos MR, Graessler J, Kovacs P, Morken MA, Narisu N, Payne F, Stancakova A, Swift AJ, Tönjes**  
453 **A, Bornstein SR, Cauchi S, Froguel P, Meyre D, Schwarz PEH, Häring H-U, Smith U, Boehnke M,**  
454 **Bergman RN, Collins FS, Mohlke KL, Tuomilehto J, Quertemous T, Lind L, Hansen T, Pedersen O,**  
455 **Walker M, Pfeiffer AFH, Spranger J, Stumvoll M, Meigs JB, Wareham NJ, Kuusisto J, Laakso M,**  
456 **Langenberg C, Dupuis J, Watanabe RM, Florez JC, Ingelsson E, McCarthy MI, Prokopenko I,**  
457 **MAGIC Investigators.** Impact of Type 2 Diabetes Susceptibility Variants on Quantitative Glycemic  
458 Traits Reveals Mechanistic Heterogeneity. *Diabetes* 63: 2158–2171, 2014.
- 459 26. **Dybala MP, Olehnik SK, Fowler JL, Golab K, Millis JM, Golebiewska J, Bachul P, Witkowski P,**  
460 **Hara M.** Pancreatic beta cell/islet mass and body mass index. *Islets* 11: 1–9, 2019.
- 461 27. **Ehrich TH, Kenney JP, Vaughn TT, Pletscher LS, Cheverud JM, Thomas H, Kenney JP, Ty T,**  
462 **Pletscher LS, James M.** Diet , Obesity , and Hyperglycemia in LG / J and SM / J Mice. 11, 2003.
- 463 28. **Ellenbroek JH, Töns HA, de Graaf N, Loomans CJ, Engelse MA, Vrolijk H, Voshol PJ, Rabelink**  
464 **TJ, Carlotti F, de Koning EJ.** Topologically Heterogeneous Beta Cell Adaptation in Response to High-  
465 Fat Diet in Mice. *PLoS One* (2013). doi: 10.1371/journal.pone.0056922.
- 466 29. **Ellenbroek JH, Töns HAM, Hanegraaf MAJ, Rabelink TJ, Engelse MA, Carlotti F, de Koning EJP.**  
467 Pancreatic  $\alpha$ -cell mass in obesity. *Diabetes, Obes Metab* 19: 1810–1813, 2017.
- 468 30. **Esposito K, Chiodini P, Colao A, Lenzi A, Giugliano D.** Metabolic syndrome and risk of cancer: a  
469 systematic review and meta-analysis. *Diabetes Care* 35: 2402–11, 2012.
- 470 31. **Farack L, Golan M, Egozi A, Dezorella N, Bahar Halpern K, Ben-Moshe S, Garzilli I, Tóth B,**  
471 **Roitman L, Krizhanovsky V, Itzkovitz S.** Transcriptional Heterogeneity of Beta Cells in the Intact  
472 Pancreas. *Dev Cell* 48: 115-125.e4, 2019.
- 473 32. **Farack L, Golan M, Egozi A, Dezorella N, Bahar Halpern K, Ben-Moshe S, Garzilli I, Tóth B,**  
474 **Roitman L, Krizhanovsky V, Itzkovitz S.** Transcriptional Heterogeneity of Beta Cells in the Intact  
475 Pancreas. *Dev Cell* 48: 115-125.e4, 2019.
- 476 33. **Fransson L, Franzén S, Rosengren V, Wolbert P, Sjöholm Å, Ortsäter H.**  $\beta$ -cell adaptation in a mouse  
477 model of glucocorticoid-induced metabolic syndrome. *J. Endocrinol.* (2013). doi: 10.1530/JOE-13-0189.
- 478 34. **Georgia S, Bhushan A.**  $\beta$  cell replication is the primary mechanism for maintaining postnatal  $\beta$  cell mass.

- 479 *J. Clin. Invest.* (2004). doi: 10.1172/jci200422098.
- 480 35. **Guillausseau PJ, Meas T, Virally M, Laloi-Michelin M, Médeau V, Kevorkian JP.** Abnormalities in  
481 insulin secretion in type 2 diabetes mellitus. *Diabetes Metab* 34, 2008.
- 482 36. **Gupta D, Jetton TL, LaRock K, Monga N, Satish B, Lausier J, Peshavaria M, Leahy JL.** Temporal  
483 characterization of  $\beta$  cell-adaptive and -maladaptive mechanisms during chronic high-fat feeding in  
484 C57BL/6NTac mice. *J Biol Chem* 292: 12449–12459, 2017.
- 485 37. **Henquin JC, Rahier J.** Pancreatic alpha cell mass in European subjects with type 2 diabetes.  
486 *Diabetologia* (2011). doi: 10.1007/s00125-011-2118-4.
- 487 38. **Hull K Kodama K M Utzschneider D B Carr R L Prigeon S E Kahn RL.** Dietary-fat-induced obesity  
488 in mice results in beta cell hyperplasia but not increased insulin release: evidence for specificity of  
489 impaired beta cell adaptation. *Diabetologia* 48: 1350–1358, 2005.
- 490 39. **Hull RL, Kodama K, Utzschneider KM, Carr DB, Prigeon RL, Kahn SE.** Dietary-fat-induced obesity  
491 in mice results in beta cell hyperplasia but not increased insulin release: Evidence for specificity of  
492 impaired beta cell adaptation. *Diabetologia* 48: 1350–1358, 2005.
- 493 40. **Hummel KP, Coleman DL, Lane PW.** The influence of genetic background on expression of mutations  
494 at the diabetes locus in the mouse. I. C57BL/KsJ and C57BL/6J strains. *Biochem Genet* 7: 1–13, 1972.
- 495 41. **Jo J, Kilimnik G, Kim A, Guo C, Periwai V, Hara M.** Formation of Pancreatic Islets Involves  
496 Coordinated Expansion of Small Islets and Fission of Large Interconnected Islet-like Structures. doi:  
497 10.1016/j.bpj.2011.06.042.
- 498 42. **Johnston NR, Mitchell RK, Trauner D, Rutter GA, Hodson DJ, Haythorne E, Pessoa MP, Semplici  
499 F, Ferrer J, Piemonti L, Marchetti P, Bugliani M, Bosco D, Berishvili E, Duncanson P, Watkinson  
500 M, Broichhagen J.** Beta Cell Hubs Dictate Pancreatic Islet Responses to Glucose Cell Metabolism Article  
501 Beta Cell Hubs Dictate Pancreatic Islet Responses to Glucose. *Cell Metab* 24: 389–401, 2016.
- 502 43. **Jonas JC, Sharma A, Hasenkamp W, Ilkova H, Patanè G, Laybutt R, Bonner-Weir S, Weir GC.**  
503 Chronic hyperglycemia triggers loss of pancreatic  $\beta$  cell differentiation in an animal model of diabetes. *J  
504 Biol Chem* 274: 14112–14121, 1999.
- 505 44. **Kahle M, Horsch M, Fridrich B, Seelig A, Schultheiß J, Leonhardt J, Irmeler M, Beckers J, Rathkolb  
506 B, Wolf E, Franke N, Gailus-Durner V, Fuchs H, Hrabě De Angelis M, Neschen S.** Phenotypic  
507 comparison of common mouse strains developing high-fat diet-induced hepatosteatosis %. *Mol Metab* 2:  
508 435–446, 2013.
- 509 45. **Kahn BB.** Type 2 diabetes: When insulin secretion fails to compensate for insulin resistance. *Cell* 92 Cell  
510 Press: 593–596, 1998.
- 511 46. **Keller MP, Choi Y, Wang P, Davis DB, Rabaglia ME, Oler AT, Stapleton DS, Argmann C, Schueler  
512 KL, Edwards S, Steinberg HA, Neto EC, Kleinhanz R, Turner S, Hellerstein MK, Schadt EE,  
513 Yandell BS, Kendziorski C, Attie AD.** A gene expression network model of type 2 diabetes links cell  
514 cycle regulation in islets with diabetes susceptibility. doi: 10.1101/gr.074914.107.
- 515 47. **Klöppel G, Löhr M, Habich K, Oberholzer M, Heitz PU.** Islet pathology and the pathogenesis of type 1  
516 and type 2 diabetes mellitus revisited. *Surv. Synth. Pathol. Res.*: 1985.
- 517 48. **Kobayashi M, Ohno T, Ihara K, Murai A, Kumazawa M.** Searching for Genomic Region of High-Fat  
518 Diet-Induced Type 2 Diabetes in Mouse Chromosome 2 by Analysis of Congenic Strains. *PLoS One* 9:  
519 96271, 2014.
- 520 49. **Kolb H, Martin S.** Environmental/lifestyle factors in the pathogenesis and prevention of type 2 diabetes.  
521 *BMC Med* 15: 131, 2017.
- 522 50. **Lawson HA, Cady JE, Partridge C, Wolf JB, Semenkovich CF, Cheverud JM.** Genetic effects at  
523 pleiotropic loci are context-dependent with consequences for the maintenance of genetic variation in  
524 populations. *PLoS Genet* 7: e1002256, 2011.
- 525 51. **Lawson HA, Cheverud JM.** Metabolic syndrome components in murine models. [Online]. *Endocr Metab  
526 Immune Disord Drug Targets* 10: 25–40, 2010. <http://www.ncbi.nlm.nih.gov/pubmed/20088816> [2 Aug.  
527 2019].
- 528 52. **Lawson HA, Lee A, Fawcett GL, Wang B, Pletscher LS, Maxwell TJ, Ehrich TH, Kenney-Hunt JP,  
529 Wolf JB, Semenkovich CF, Cheverud JM.** The importance of context to the genetic architecture of



- 530 diabetes-related traits is revealed in a genome-wide scan of a LG/J × SM/J murine model. *Mamm Genome*  
531 22: 197–208, 2011.
- 532 53. **Lawson HA, Zelle KM, Fawcett GL, Wang B, Pletscher LS, Maxwell TJ, Ehrich TH, Kenney-Hunt**  
533 **JP, Wolf JB, Semenkovich CF, Cheverud JM.** Genetic, epigenetic, and gene-by-diet interaction effects  
534 underlie variation in serum lipids in a LG/JxSM/J murine model. *J Lipid Res* 51: 2976–84, 2010.
- 535 54. **Leiter EH, Coleman DL, Eisenstein AB, Strack I.** A new mutation (db3J) at the diabetes locus in strain  
536 129/J mice - I. Physiological and histological characterization. *Diabetologia* 19: 58–65, 1980.
- 537 55. **Lencioni C, Lupi R, Del Prato S.** β-cell failure in type 2 diabetes mellitus. *Curr. Diab. Rep.* 8: 179–184,  
538 2008.
- 539 56. **Liu YQ, Jetton TL, Leahy JL.** β-cell adaptation to insulin resistance. Increased pyruvate carboxylase and  
540 malate-pyruvate shuttle activity in islets of nondiabetic Zucker fatty rats. *J Biol Chem* 277: 39163–39168,  
541 2002.
- 542 57. **MACLEAN N, OGILVIE RF.** Quantitative estimation of the pancreatic islet tissue in diabetic subjects.  
543 *Diabetes* (1955). doi: 10.2337/diab.4.5.367.
- 544 58. **Marchetti P, Del Guerra S, Marselli L, Lupi R, Masini M, Pollera M, Bugliani M, Boggi U, Vistoli F,**  
545 **Mosca F, Del Prato S.** Pancreatic islets from type 2 diabetic patients have functional defects and  
546 increased apoptosis that are ameliorated by metformin. *J. Clin. Endocrinol. Metab.* (2004). doi:  
547 10.1210/jc.2004-0150.
- 548 59. **Marselli L, Suleiman M, Masini M, Campani D, Bugliani M, Syed F, Martino L, Focosi D, Scatena**  
549 **F, Olimpico F, Filippini F, Masiello P, Boggi U, Marchetti P.** Are we overestimating the loss of beta  
550 cells in type 2 diabetes? *Diabetologia* (2014). doi: 10.1007/s00125-013-3098-3.
- 551 60. **Meier JJ, Butler AE, Saisho Y, Monchamp T, Galasso R, Bhushan A, Rizza RA, Butler PC.** Cell  
552 Replication Is the Primary Mechanism Subservicing the Postnatal Expansion of Cell Mass in Humans.  
553 (2008). doi: 10.2337/db07-1369.
- 554 61. **Meigs JB, Wilson PWF, Fox CS, Vasan RS, Nathan DM, Sullivan LM, D’agostino RB.** Body Mass  
555 Index, Metabolic Syndrome, and Risk of Type 2 Diabetes or Cardiovascular Disease. (2940). doi:  
556 10.1210/jc.2006-0594.
- 557 62. **Merino B, Alonso-Magdalena P, Lluesma M, Neco P, Gonzalez A, Marroquí L, García-Arévalo M,**  
558 **Nadal A, Quesada I.** Pancreatic alpha-cells from female mice undergo morphofunctional changes during  
559 compensatory adaptations of the endocrine pancreas to diet-induced obesity. *Sci Rep* 5: 1–13, 2015.
- 560 63. **Mezza T, Muscogiuri G, Sorice GP, Clemente G, Hu J, Pontecorvi A, Holst JJ, Giaccari A, Kulkarni**  
561 **RN.** Insulin resistance alters islet morphology in nondiabetic humans. *Diabetes* (2014). doi: 10.2337/db13-  
562 1013.
- 563 64. **Nikolskiy I, Conrad DF, Chun S, Fay JC, Cheverud JM, Lawson HA.** Using whole-genome sequences  
564 of the LG/J and SM/J inbred mouse strains to prioritize quantitative trait genes and nucleotides. *BMC*  
565 *Genomics* 16: 415, 2015.
- 566 65. **Ninomiya JK, Gilbert L’italien ;, Criqui MH, Whyte JL, Gamst A, Chen RS.** Association of the  
567 Metabolic Syndrome With History of Myocardial Infarction and Stroke in the Third National Health and  
568 Nutrition Examination Survey. *Circulation* 109: 42–46, 2004.
- 569 66. **Ogilvie RF.** The islands of langerhans in 19 cases of obesity. *J. Pathol. Bacteriol.* (1933). doi:  
570 10.1002/path.1700370314.
- 571 67. **Ojha A, Ojha U, Mohammed R, Chandrashekar A, Ojha H.** Current perspective on the role of insulin  
572 and glucagon in the pathogenesis and treatment of type 2 diabetes mellitus. *Clin Pharmacol Adv Appl*  
573 Volume 11: 57–65, 2019.
- 574 68. **Peyot ML, Pepin E, Lamontagne J, Latour MG, Zarrouki B, Lussier R, Pineda M, Jetton TL,**  
575 **Madiraju SRM, Joly E, Prentki M.** β-cell failure in diet-induced obese mice stratified according to body  
576 weight gain: Secretory dysfunction and altered islet lipid metabolism without steatosis or reduced β-cell  
577 mass. *Diabetes* (2010). doi: 10.2337/db09-1452.
- 578 69. **Pipeleers D, Ling Z.** Pancreatic beta cells in insulin-dependent diabetes. *Diabetes Metab Rev* 8: 209–227,  
579 1992.
- 580 70. **Porat S, Weinberg-Corem N, Tornovsky-Babaey S, Schyr-Ben-Haroush R, Hija A, Stolovich-Rain**

- 581 **M, Dadon D, Granot Z, Ben-Hur V, White P, Girard CA, Karni R, Kaestner KH, Ashcroft FM,**  
582 **Magnuson MA, Saada A, Grimsby J, Glaser B, Dor Y.** Control of Pancreatic  $\beta$  Cell Regeneration by  
583 Glucose Metabolism. *Cell Metab* 13: 440–449, 2011.
- 584 71. **Puri S, Roy N, Russ HA, Leonhardt L, French EK, Roy R, Bengtsson H, Scott DK, Stewart AF,**  
585 **Hebrok M.** Replication confers  $\beta$  cell immaturity. *Nat. Commun.* (2018). doi: 10.1038/s41467-018-02939-  
586 0.
- 587 72. **Rahier J, Guiot Y, Goebbels RM, Sempoux C, Henquin JC.** Pancreatic  $\beta$ -cell mass in European  
588 subjects with type 2 diabetes. In: *Diabetes, Obesity and Metabolism*. 2008.
- 589 73. **Razavi R, Najafabadi HS, Abdullah S, Smukler S, Arntfield M, van der Kooy D.** Diabetes enhances  
590 the proliferation of adult pancreatic multipotent progenitor cells and biases their differentiation to more  $\beta$ -  
591 cell production. *Diabetes* 64: 1311–23, 2015.
- 592 74. **Saisho Y, Butler AE, Manesso E, Elashoff D, Rizza RA, Butler PC.**  $\beta$ -Cell mass and turnover in  
593 humans: Effects of obesity and aging. *Diabetes Care* (2013). doi: 10.2337/dc12-0421.
- 594 75. **Sakuraba H, Mizukami H, Yagihashi N, Wada R, Hanyu C, Yagihashi S.** Reduced beta-cell mass and  
595 expression of oxidative stress-related DNA damage in the islet of Japanese Type II diabetic patients.  
596 *Diabetologia* (2002). doi: 10.1007/s125-002-8248-z.
- 597 76. **Salinno C, Cota P, Bastidas-Ponce A, Tarquis-Medina M, Lickert H, Bakhti M.**  $\beta$ -Cell Maturation  
598 and Identity in Health and Disease. *Int J Mol Sci* 20, 2019.
- 599 77. **Scheen AJ.** PATHOPHYSIOLOGY OF TYPE 2 DIABETES. *Acta Clin Belg* 58: 335–341, 2003.
- 600 78. **Seino S, Shibasaki T, Minami K.** Dynamics of insulin secretion and the clinical implications for obesity  
601 and diabetes. *J Clin Invest* 121: 2118–2125, 2011.
- 602 79. **Seino S, Shibasaki T, Minami K.** Dynamics of insulin secretion and the clinical implications for obesity  
603 and diabetes. *J Clin Invest* 121: 2118–25, 2011.
- 604 80. **Seymour PA, Bennett WR, Slack JMW.** Fission of pancreatic islets during postnatal growth of the  
605 mouse. *J Anat* 204: 103–116, 2004.
- 606 81. **Shirakawa J, Fernandez M, Takatani T, El Ouaamari A, Jungtrakoon P, Okawa ER, Zhang W, Yi**  
607 **P, Doria A, Kulkarni RN.** Insulin Signaling Regulates the FoxM1/PLK1/CENP-A Pathway to Promote  
608 Adaptive Pancreatic  $\beta$  Cell Proliferation. *Cell Metab.* (2017). doi: 10.1016/j.cmet.2017.02.004.
- 609 82. **Sims EK, Hatanaka M, Morris DL, Tersey SA, Kono T, Chaudry ZZ, Day KH, Moss DR, Stull ND,**  
610 **Mirmira RG, Evans-Molina C.** Divergent compensatory responses to high-fat diet between C57BL6/J  
611 and C57BLKS/J inbred mouse strains. *Am J Physiol Endocrinol Metab* 305: 1495–1511, 2013.
- 612 83. **Sims EK, Hatanaka M, Morris DL, Tersey SA, Kono T, Chaudry ZZ, Day KH, Moss DR, Stull ND,**  
613 **Mirmira RG, Evans-Molina C.** Divergent compensatory responses to high-fat diet between C57BL6/J  
614 and c57BKS/J inbred mouse strains. *Am J Physiol - Endocrinol Metab* 305: E1495, 2013.
- 615 84. **Smukler SR, Arntfield ME, Razavi R, Bikopoulos G, Karpowicz P, Seaberg R, Dai F, Lee S, Ahrens**  
616 **R, Fraser PE, Wheeler MB, van der Kooy D.** The Adult Mouse and Human Pancreas Contain Rare  
617 Multipotent Stem Cells that Express Insulin. *Cell Stem Cell* 8: 281–293, 2011.
- 618 85. **Smukler SR, Arntfield ME, Razavi R, Bikopoulos G, Karpowicz P, Seaberg R, Dai F, Lee S, Ahrens**  
619 **R, Fraser PE, Wheeler MB, van der Kooy D.** The Adult Mouse and Human Pancreas Contain Rare  
620 Multipotent Stem Cells that Express Insulin. *Cell Stem Cell* 8: 281–293, 2011.
- 621 86. **Stumvoll M, Goldstein BJ, Van Haeften TW.** Type 2 diabetes: Principles of pathogenesis and therapy.  
622 In: *Lancet*. 2005.
- 623 87. **Surwit RS, Kuhn CM, Cochrane C, McCubbin JA, Feinglos MN.** Diet-induced type II diabetes in  
624 C57BL/6J mice. *Diabetes* (1988). doi: 10.2337/diab.37.9.1163.
- 625 88. **Talchai C, Xuan S, Lin H V, Sussel L, Accili D.** Pancreatic  $\beta$  Cell Dedifferentiation as a Mechanism of  
626 Diabetic  $\beta$  Cell Failure. doi: 10.1016/j.cell.2012.07.029.
- 627 89. **Teta M, Long SY, Wartschow LM, Rankin MM, Kushner JA.** Very Slow Turnover of  $\beta$ -Cells in Aged  
628 Adult Mice. *Diabetes* 54: 2557–2567, 2005.
- 629 90. **Thorel F, Népote V, Avril I, Kohno K, Desgraz R, Chera S, Herrera PL.** Conversion of adult  
630 pancreatic  $\alpha$ -cells to  $\beta$ -cells after extreme  $\beta$ -cell loss. *Nature* 464: 1149–1154, 2010.
- 631 91. **Thorel F, Népote V, Avril I, Kohno K, Desgraz R, Chera S, Herrera PL.** Conversion of adult

- 632 pancreatic  $\alpha$ -cells to B-cells after extreme B-cell loss. *Nature* 464: 1149–1154, 2010.
- 633 92. **van der Meulen T, Mawla AM, DiGruccio MR, Adams MW, Nies V, Dölleman S, Liu S, Ackermann**
- 634 **AM, Cáceres E, Hunter AE, Kaestner KH, Donaldson CJ, Huising MO.** Virgin Beta Cells Persist
- 635 throughout Life at a Neogenic Niche within Pancreatic Islets. *Cell Metab* 25: 911-926.e6, 2017.
- 636 93. **Van Der Meulen T, Mawla AM, Digruccio MR, Kaestner KH, Donaldson CJ, Huising**
- 637 **Correspondence MO.** Virgin Beta Cells Persist throughout Life at a Neogenic Niche within Pancreatic
- 638 Islets. doi: 10.1016/j.cmet.2017.03.017.
- 639 94. **Weir GC, Bonner-Weir S, Leahy JL.** Islet mass and function in diabetes and transplantation. *Diabetes*
- 640 39: 401–405, 1990.
- 641 95. **Younis A, Younis A, Tzur B, Peled Y, Shlomo N, Goldenberg I, Fisman EZ, Tenenbaum A,**
- 642 **Klempfner R.** Metabolic syndrome is independently associated with increased 20-year mortality in
- 643 patients with stable coronary artery disease. *Cardiovasc Diabetol* 15: 149, 2016.
- 644 96. **Zhong F, Jiang Y.** Endogenous pancreatic  $\beta$  cell regeneration: A potential strategy for the recovery of  $\beta$
- 645 cell deficiency in diabetes. *Front Endocrinol (Lausanne)* 10, 2019.
- 646
- 647
- 648
- 649
- 650
- 651
- 652
- 653
- 654
- 655
- 656
- 657
