# Supplementary material for: Spontaneous restoration of functional β-cell mass in obese SM/J mice
Source: bioRxiv or medRxiv preprint supplement (doi:10.1101/2020.05.19.104588), 2020-05-19
Supplement: Supplementary file [file media-1.pdf]

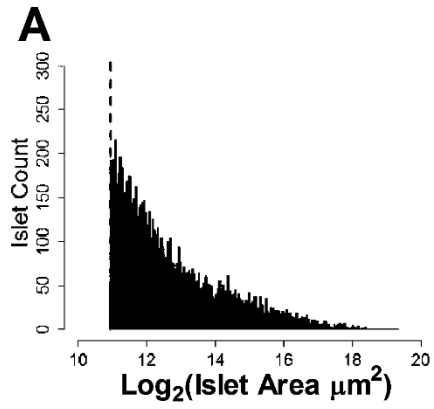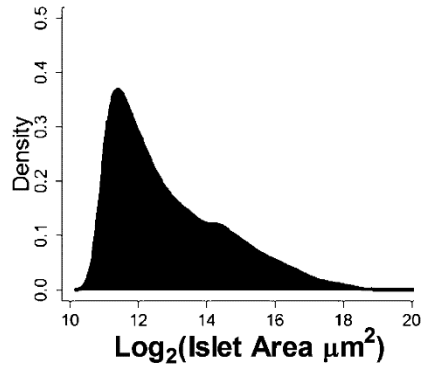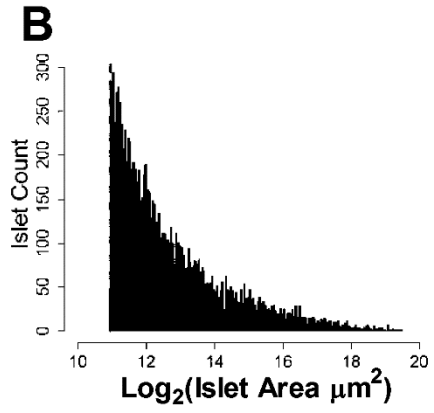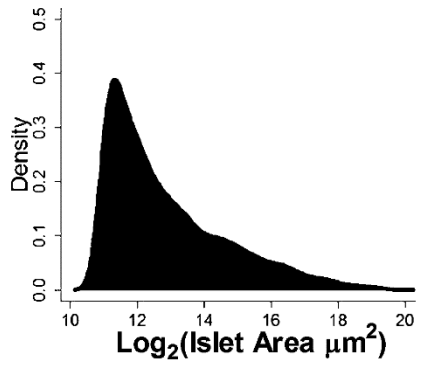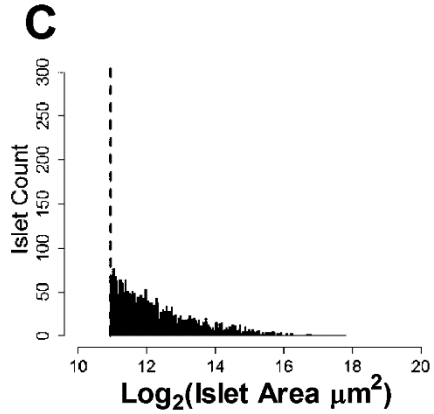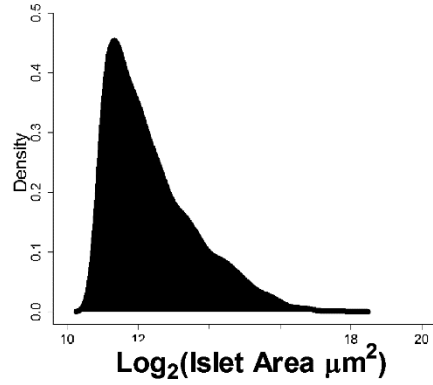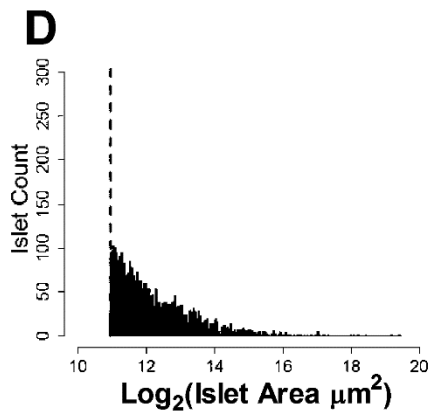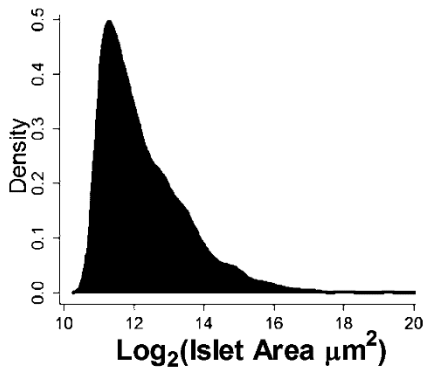

**Supplemental Figure 1.** Islet area histogram (left) and density plot (right) for each cohort, 20-week high fat (A), 30-week high fat (B), 20-week low fat (C), and 30-week low fat (D). Dashed line shows islet size threshold. N= 2,333-10,380 islets per cohort.

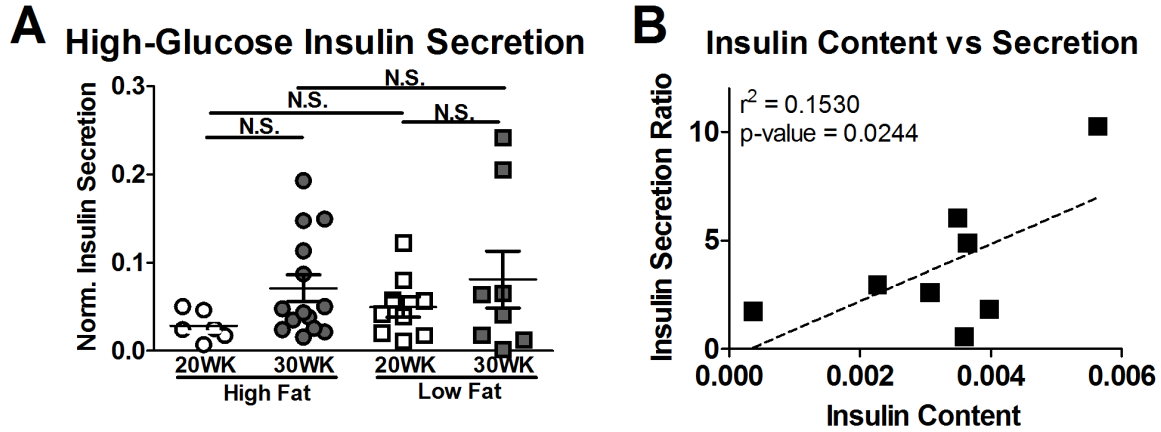

**Supplemental Figure 2.** Normalized insulin secretion in response to elevated (11 mM) glucose (A). Islet insulin content vs glucose-stimulated insulin secretion for low fat-fed mice (B). A, N =5-14 individuals per cohort. B, N = 8. N.S. – Not significant

**Supplemental Table 1.** Cohort metrics for islet mass quantification.

| Cohort | Individuals | Female /Male Ratio | Slides | Total Islets | Total Islet Area ( $\mu\text{m}^2$ ) | Avg Islet Area ( $\mu\text{m}^2$ ) | Islets/Slide | Area/Slide | Total Tissue Area ( $\mu\text{m}^2$ ) | Islet Area/Tissue Area |
|--------|-------------|--------------------|--------|--------------|--------------------------------------|------------------------------------|--------------|------------|---------------------------------------|------------------------|
| 20 HF  | 16          | 0.5                | 62     | 8,320        | 132,564,412                          | 15,933                             | 134.2        | 2,138,136  | 496,461,183                           | 0.27                   |
| 30 HF  | 16          | 0.5                | 64     | 10,380       | 194,565,474                          | 18,744                             | 162.2        | 3,040,086  | 512,715,812                           | 0.38                   |
| 20 LF  | 12          | 0.5                | 48     | 2,333        | 19,956,617                           | 8,554                              | 48.6         | 415,763    | 176,863,435                           | 0.11                   |
| 30 LF  | 11          | 0.64               | 40     | 3,141        | 28,581,981                           | 9,100                              | 78.5         | 714,550    | 198,371,139                           | 0.14                   |
